# Serum sirtuin1: a potential blood biomarker for early diagnosis of Alzheimer's disease

Jia Wang<sup>1,3,\*</sup>, Fang Zhou<sup>2,\*</sup>, Chang-E Xiong<sup>1,3,\*</sup>, Gui-Ping Wang<sup>1,3</sup>, Lin-Wanyue Chen<sup>1,3</sup>, Yu-Tong Zhang<sup>4</sup>, Shi-Ge Qi<sup>4</sup>, Zhi-Hui Wang<sup>4</sup>, Can Mei<sup>1,3</sup>, Yu-Jia Xu<sup>1,3</sup>, Jian-Bo Zhan<sup>2</sup>, Jing Cheng<sup>1,3</sup>

<sup>1</sup>School of Public Health, Wuhan University of Science and Technology, Wuhan 430065, Hubei, China

<sup>2</sup>Hubei Provincial Center for Disease Control and Prevention, Wuhan 430079, Hubei, China

<sup>3</sup>Hubei Province Key Laboratory of Occupational Hazard Identification and Control, Wuhan University of Science and Technology, Wuhan 430065, Hubei, China

<sup>4</sup>Chinese Center for Disease Control and Prevention, Beijing 102206, China

\*Equal contribution and share first authorship

**Correspondence to:** Jian-Bo Zhan, Jing Cheng; **email:** [jbzhan8866@163.com](mailto:jbzhan8866@163.com), <https://orcid.org/0000-0002-5885-1970>; [chengjing84@wust.edu.cn](mailto:chengjing84@wust.edu.cn)

**Keywords:** serum, biomarker, early diagnosis, Alzheimer's disease

**Received:** May 1, 2023

**Accepted:** August 20, 2023

**Published:** September 22, 2023

**Copyright:** © 2023 Wang et al. This is an open access article distributed under the terms of the [Creative Commons Attribution License](https://creativecommons.org/licenses/by/3.0/) (CC BY 3.0), which permits unrestricted use, distribution, and reproduction in any medium, provided the original author and source are credited.

## ABSTRACT

**Background:** Sirtuin 1, a nicotinamide adenine dinucleotide-dependent deacetylase that is highly expressed in the hippocampus and anterior cortex tissues related to Alzheimer's Disease pathology, can cross the blood-brain barrier and is a promising biomarker.

**Methods:** A 1:1:1 case-control study was conducted and serum fasting blood glucose, triglyceride, total cholesterol, high-density lipoprotein cholesterol, low-density lipoprotein cholesterol, SIRT1, IL-6, Aβ1-42, T-tau and P-tau-181 levels were evaluated in blood samples of 26 patients from the Alzheimer's Disease group, 26 patients from the mild cognitive impairment group, and 26 individuals from the normal control group. Receiver operator characteristic curves were used to evaluate the diagnostic significance.

**Results:** Serum SIRT1 level was significantly down-regulated in the mild cognitive impairment patients and Alzheimer's Disease patients compared with that in the normal control group ( $P < 0.05$ ). ROC curve analysis demonstrated that SIRT1 was a promising biomarker to distinguish Alzheimer's Disease patients from the mild cognitive impairment patients and the normal control group. In addition, SIRT1 was estimated to perform well in the diagnosis of Alzheimer's Disease ([AUC] = 0.742).

**Conclusions:** In summary, the present study suggested that serum SIRT1 might be an early promising diagnostic biomarker for Alzheimer's Disease.

## INTRODUCTION

According to the latest statistics of the World Health Organization (WHO), Alzheimer's Disease (AD) is the seventh cause of death among all diseases in the world [1]. AD is the most common senile neurodegenerative disease characterized by cognitive dysfunction and behavioral changes, and is the main cause of senile dementia [2, 3]. Epidemiological data forecast that there are approximately 50 million people living with

dementia worldwide, and nearly 60% of them live in low- and middle-income countries up to now. There are 10 million new cases a year. The proportion of people aged 60 years and over with dementia is estimated to be 5–8%, and the total number of people with dementia will reach 82 million by 2030 and 152 million by 2050 [4, 5].

Mild cognitive impairment (MCI) is an early stage of preclinical AD [6]. According to the statistics, there is 10–20% of MCI patients progressing to AD every year.

AD is irreversible, yet MCI can be reversed [7]. Therefore, early identification and diagnosis of MCI is of great significance. At present, the diagnosis and treatment of AD or MCI are still very insufficient worldwide, especially in China, where the consultation rate of AD patients is relatively low.

The most accurate way to diagnose Alzheimer's disease is to perform brain dissection on the patient's brain tissue and determine whether the subject has typical pathological manifestations of Alzheimer's disease, such as neuroinflammatory plaques and neurofibrillary tangles, to determine whether the subject has Alzheimer's disease [8, 9]. However, due to the non-feasibility of such methods, to diagnose and conclude the conditions, medical practitioners mainly depend on clinical symptoms, physical examination, MMSE, positron emission tomography (PET) of tracer molecules [10] and analysis of cerebrospinal fluid (CSF) proteins [11] and use tests to examine a patient's mental ability [9, 12, 13]. However, the sensitivity and specificity of such tests are usually not high enough; thus, these tests cannot be used to make an effective and accurate judgment of the disease. On the other hand, the procedures are complicated and often affected by many factors. The newer genetic tests [14] and CSF biochemical tests in recent years cannot be popularized in hospitals at all levels, due to their inconvenient procedures and expensive examination cost, thus limiting their clinical application. MoCA is a promising tool, but its specificity for detecting early AD is rather low [15]. As a result, less traumatic accessible and inexpensive blood tests are widely accepted and have become more and more charming in AD diagnosis. Blood samples are easy to obtain, stable, less traumatic, and can avoid the decline in physical function caused by pathological punctures; these advantages determine the great superiority of blood biomarkers [16–20]. Therefore, the exploration of biomarkers for early identification and diagnosis of AD in peripheral blood has become a research hotspot. At present, the plasma biomarkers that have been proved to be strongly correlated with AD include plasma T-tau, P-tau-181 [21], p-tau217, p-tau231 [22], NFL [23] and Peripheral inflammatory biomarkers [24]. Because of the consistency of these proteins, the plasma T-tau, P-tau-181, A $\beta$ 42, and NFL proteins are used in clinical trials and studies. In recent years, with the improvement of the sensitivity and specificity of enzyme-linked immunosorbent assay (ELISA), it has been gradually used to detect A $\beta$ 1-42, T-tau, and P-tau-181 in peripheral blood [25], which is in conformity with our previous findings [22].

SIRT1 is a NAD<sup>+</sup>-dependent deacetylase with neuro-protective functions [26]; it is highly expressed in the

hippocampus and anterior cortex tissues related to AD pathology and can access all body tissues after crossing the blood-brain barrier [27]. Recently, a host of studies have reported the protective role of SIRT1 in aging-related diseases, which can participate in the regulation of cell differentiation, apoptosis, oxidative stress, autophagy and other processes by playing a deacetylation role [28, 29]. Liu, L., et al. [30] found that the SIRT1 level was down-regulated in the brain of AD patients during progression from the early stage to the late stage. Therefore, serum SIRT1 protein is regarded as a potential biomarker for the early diagnosis of AD. In the present study, based on our previous research work [31], we aimed to detect serum SIRT1, A $\beta$ 1-42, T-tau, and P-tau-181 protein levels in AD, MCI patients, and normal controls (NCs), and assess their potential as early diagnostic biomarkers for AD.

## RESULTS

### Detection of blood-related indexes

#### *Detection of blood biochemical indexes*

As shown in Table 1.

#### *Serum assays for SIRT1, IL-6, A $\beta$ 1-42, T-Tau, and P-tau-181 protein*

As shown in Table 2, serum SIRT1 protein levels were successively down-regulated in the NC, MCI, and AD groups. Compared with that in the NC group, the serum SIRT1 level in the MCI and AD groups was significantly down-regulated, and the difference was statistically significant ( $P < 0.05$ ). As shown in Figure 1, the level of inflammatory factor IL-6 was inversely correlated with the change in SIRT1 levels. Compared with that in the NC group ( $1.65 \pm 0.35$  ng/ $\mu$ L), the serum IL-6 levels in the MCI group ( $2.02 \pm 0.56$  ng/ $\mu$ L) and the AD group ( $3.58 \pm 0.98$  ng/ $\mu$ L) were significantly up-regulated ( $P < 0.05$ ), as shown in Figure 2, and the serum A $\beta$ 1-42 level in the MCI group was significantly up-regulated ( $P < 0.05$ ); that in the AD group was also up-regulated, but the difference was not significant ( $P > 0.05$ ). In the NC, MCI, and AD groups, the serum A $\beta$ 1-42 level showed a trend of up-regulation first and then down-regulation. As shown in Figure 3, compared with those in the NC group, there was no significant difference in the serum P-tau-181 and T-tau levels among the NC, MCI, and AD groups ( $P > 0.05$ ).

#### **Diagnostic performances of SIRT1, IL-6, A $\beta$ 1-42, P-tau-181, and T-tau protein for AD**

Correlation analysis showed that serum SIRT1 levels were positively correlated with MMSE scores ( $r_s = 0.47$ ,

**Table 1. Comparison of blood biochemical parameters in the case and control groups (mean±SD).**

| Variables (mmol/L, mean±SD) | NC (n=26) | MCI (n=26) | AD (n=26) | <i>P</i> * | <i>P</i> ** | <i>P</i> *** |
|-----------------------------|-----------|------------|-----------|------------|-------------|--------------|
| FBG                         | 4.53±0.98 | 8.09±3.99  | 4.75±1.99 | 0.612      | 0.000       | 0.000        |
| TC                          | 5.26±1.26 | 4.81±1.48  | 5.46±1.18 | 0.582      | 0.264       | 0.086        |
| TG                          | 1.44±0.55 | 1.81±1.08  | 1.14±0.54 | 0.098      | 0.105       | 0.007        |
| LDL-C                       | 2.61±0.87 | 2.85±1.69  | 3.68±2.02 | 0.023      | 0.508       | 0.110        |
| HDL-C                       | 1.68±0.37 | 1.68±0.47  | 1.53±0.39 | 0.178      | 0.982       | 0.182        |

Note: *P*\* represents the comparison between AD group and NC group, *P*\*\* represents the comparison between MCI group and NC group and *P*\*\*\* represents the comparison between MCI group and AD group. FBG, fasting blood glucose; TC, total cholesterol; TG, triglyceride; LDL-C, Low-Density Lipoprotein Cholesterol; HDL-C, High-Density Lipoprotein Cholesterol.

**Table 2. Comparison of serum protein levels in the case and control groups (mean±SD).**

| Variables (mean±SD) | AD(n=26)      | MCI(n=26)     | NC(n=26)     | <i>P</i> * | <i>P</i> ** | <i>P</i> *** |
|---------------------|---------------|---------------|--------------|------------|-------------|--------------|
| SIRT1(ng/μl)        | 1.06±0.471    | 1.29±0.21     | 2.90±2.01    | 0.441      | 0.000       | 0.000        |
| IL-6(ng/μl)         | 3.58±0.98     | 2.02±0.56     | 1.65±0.35    | 0.000      | 0.011       | 0.000        |
| Aβ1-42(pg/μl)       | 380.18±76.04  | 665.87±133.17 | 225.43±45.09 | 0.187      | 0.018       | 0.200        |
| P-tau-181(pg/μl)    | 2598.4±519.68 | 3404.7±680.94 | 298.20±59.64 | 0.104      | 0.394       | 0.454        |
| T-tau(pg/μl)        | 162.37±32.47  | 211.38±42.28  | 90.43±18.09  | 0.505      | 0.067       | 0.237        |

Note: *\*P* represents the comparison between AD and MCI groups; *\*\*P* represents the comparison between MCI and NC groups; *\*\*\*P* represents the comparison between the AD and NC groups.

*P*=0.000); IL-6, Aβ1-42, T-Tau, and P-tau-181 levels were inversely correlated with MMSE scores ( $r_1=-0.73$ , *P*=0.000;  $r_A=-0.34$ , *P*=0.002;  $r_T=-0.58$ , *P*=0.000;  $r_P=-0.27$ , *P*=0.015); all differences were statistically significant (*P*<0.05). The results are shown in Table 3 and the scatter plots are shown in Figures 4–8.

The diagnostic performances of serum SIRT1, IL-6, Aβ1-42, P-tau-181, and T-tau for AD were evaluated by ROC curve analysis. The AUC, sensitivity, specificity, and all cut-off values of SIRT1, IL-6, Aβ1-42, P-tau-181, and T-tau levels were determined using ROC analysis and were summarized in Table 4. SIRT1

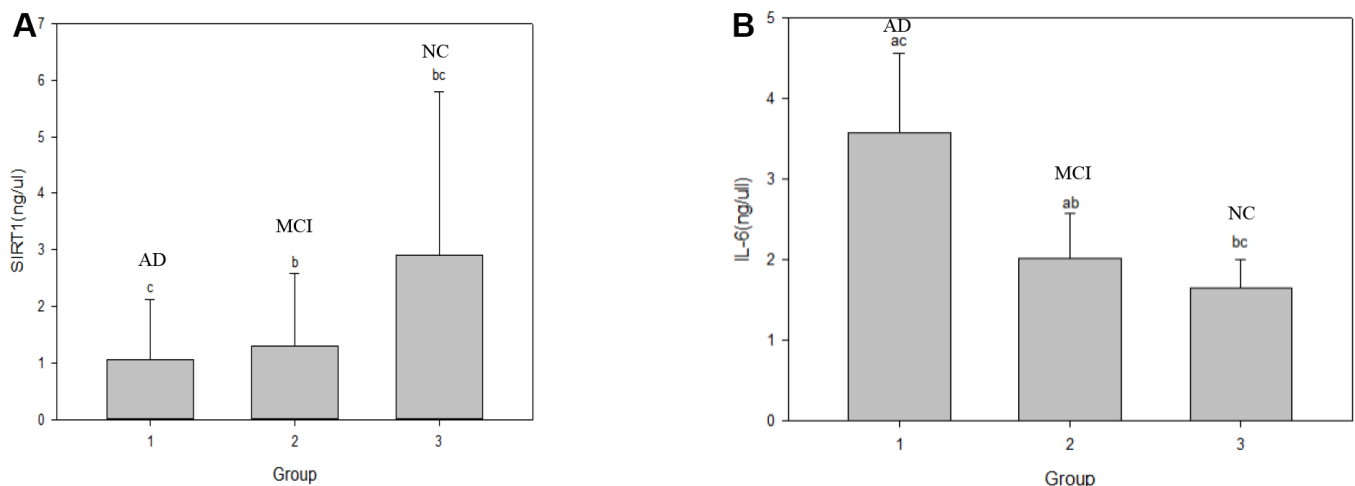

**Figure 1. Comparison of serum SIRT1 and IL-6 levels in the NC, MCI and AD groups.** Note: a represents *\*P*, b represents *\*\*P* and c represents *\*\*\*P*, *\*P* represents the comparison between AD and MCI groups; *\*\*P* represents the comparison between MCI and NC groups; *\*\*\*P* represents the comparison between the AD and NC groups. (A) graph shows the changes in serum SIRT1 level in the three groups respectively. (B) graph shows the changes in serum IL-6 level in the three groups respectively. NC: normal control, MCI: mild cognitive impairment, AD: Alzheimer's Disease.

predicted the presence of AD with an AUC of 0.742 (95% CI: 0.60–0.85), 88.5% sensitivity, and 65.4% specificity. The ROC curves are shown in Figures 9–11.

## DISCUSSION

### The key findings of the study

The silent information regulator sirtuin 1 (SIRT1) protein is a histone deacetylase, which links the

metabolic state of cells with the regulation of gene expression and many processes related to cancer (such as apoptosis, oxidative stress, neuronal autophagy, immune response and so on) [32, 33]. Sirtuin 1 is highly expressed in the hippocampus and anterior cortex, which are associated with Alzheimer's disease (AD) pathology. Overexpression or elevation of SIRT1 concentration can reduce A $\beta$  aggregation and degrade tau. Therefore, lack of sirtuin expression in the hippocampal neurons will impair cognitive function, including recent memory and

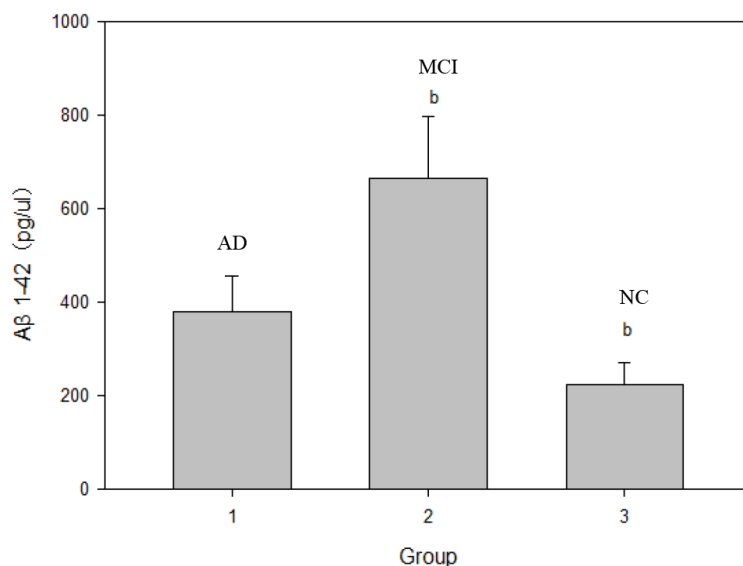

**Figure 2. Comparison of serum A $\beta$ 1-42 protein levels in NC, MCI and AD groups.** Note: b represents  $**P$ ;  $**P$  represents the comparison between MCI and NC groups.

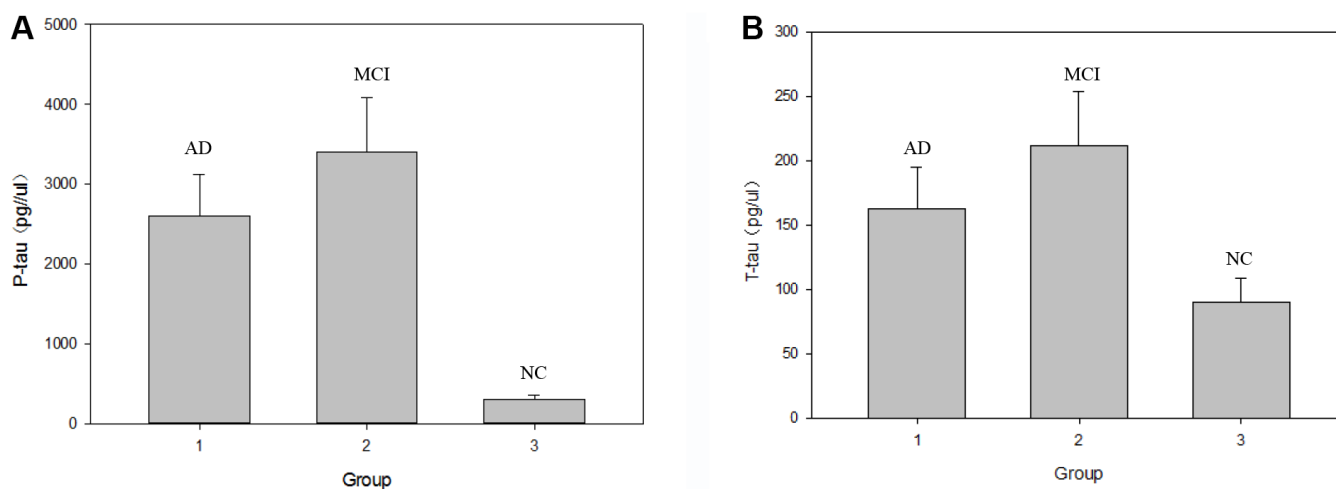

**Figure 3. Comparison of serum P-tau-181 and T-tau protein levels in the NC, MCI and AD groups.** Note: (A) graph shows the changes in serum P-tau-181 level in the three groups respectively. (B) graph shows the changes in serum T-tau level in the three groups respectively.

**Table 3. Correlation of serum SIRT1, IL-6, A $\beta$ 1-42, T-Tau and P-tau-181 levels with MMSE scores.**

| Variables                   | r     | P(n=78) |
|-----------------------------|-------|---------|
| SIRT1(ng/ $\mu$ l)          | 0.47  | 0.000   |
| IL-6(ng/ $\mu$ l)           | -0.73 | 0.000   |
| A $\beta$ 1-42(pg/ $\mu$ l) | -0.34 | 0.002   |
| P-tau-181(pg/ $\mu$ l)      | -0.58 | 0.000   |
| T-tau(pg/ $\mu$ l)          | -0.27 | 0.015   |

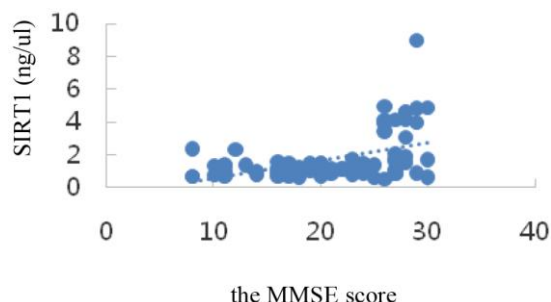

**Figure 4. Correlation analysis of SIRT1 and MMSE.**

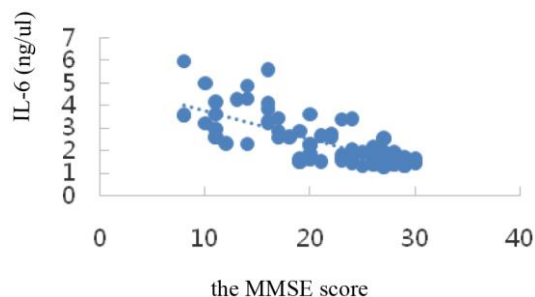

**Figure 5. Correlation analysis of IL-6 and MMSE.**

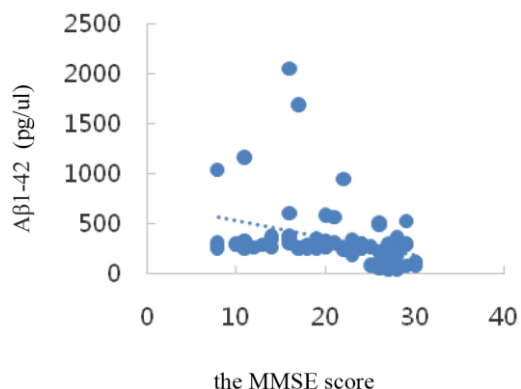

**Figure 6. Correlation analysis of A $\beta$ 1-42 and MMSE.**

spatial learning [34]. Previous studies have shown that the reduction of SIRT1 level can lead to Alzheimer's disease by promoting A $\beta$  aggregation and tau hyperphosphorylation [35, 36]. Pradhan, R. et al. reported that the sirtuins family was composed of seven members. Compared with MCI and GC, the sirtuins in AD group were significantly reduced, and the levels of SIRT1, SIRT3 and SIRT6 (mean $\pm$ SD) were significantly reduced. ROC analysis showed that for AD and MCI had high sensitivity and specificity [37]. In addition, Jiao, F. and Z. Gongamong also showed that seven

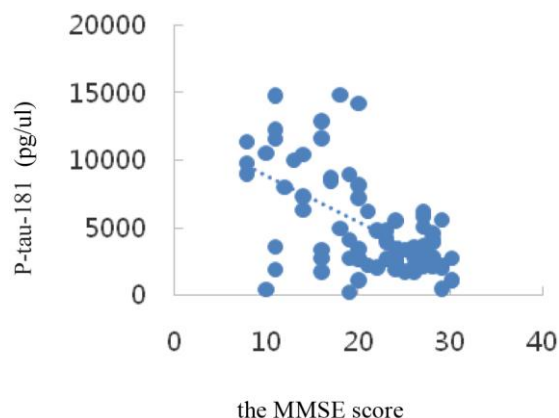

**Figure 7. Correlation analysis of P-tau-181 and MMSE.**

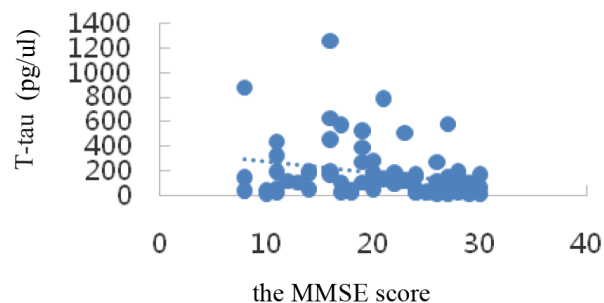

**Figure 8. Correlation analysis of T-tau and MMSE.**

**Table 4. ROC curve analysis of serum protein indicators (n=78).**

| ROC indicator    | Criterion  | Se(%) | Sp(%) | AUC   | 95%CI     | P     |
|------------------|------------|-------|-------|-------|-----------|-------|
| SIRT1(ng/μl)     | > 1.0102   | 88.5  | 65.4  | 0.742 | 0.60-0.85 | 0.000 |
| IL-6(ng/μl)      | ≤2.2765    | 76.9  | 100   | 0.930 | 0.82-0.98 | 0.000 |
| Aβ1-42(pg/μl)    | ≤331.0235  | 80.8  | 46.2  | 0.629 | 0.48-0.76 | 0.098 |
| P-tau-181(pg/μl) | ≤6258.1062 | 92.3  | 76.9  | 0.831 | 0.70-0.92 | 0.000 |
| T-tau(pg/μl)     | ≤190.3876  | 80.8  | 42.3  | 0.578 | 0.43-0.71 | 0.338 |

Note: ROC, receiver operator characteristic.

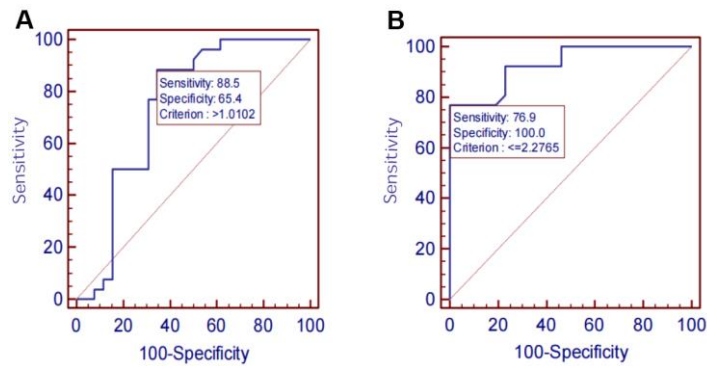

**Figure 9. (A) SIRT1 ROC curve. (B) IL-6 ROC curve.**

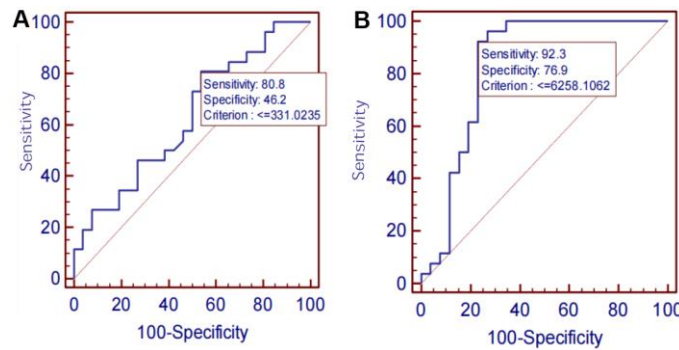

**Figure 10. (A) Aβ1-42 ROC curve. (B) P-tau-181 ROC curve.**

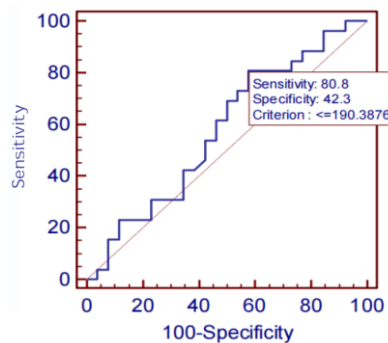

**Figure 11. T-tau ROC curve.**

sirtuins, SIRT1, play an significant regulatory role in a wide range of physiological processes, including oxidative stress, regulation of synaptic plasticity, metabolism as well as cancer [38]. Cui, Z., et al., and Buglio, D.S., et al. reported that SIRT1 may provide a new therapeutic direction for the treatment of age-related diseases by inhibiting oxidative stress, reducing inflammatory response and restoring mitochondrial dysfunction [39]. There are some studies demonstrating that SIRT1 regulates the expression of proinflammatory cytokines, for instance, tumor necrosis factor (TNF), interleukin-1  $\beta$  (IL-1 $\beta$ ), and interferon  $\gamma$  (IFN- $\gamma$ ) during microglial activation [40], as well as alleviates degeneration of dopaminergic neurons [41]. Yin, Z., et al. and Yin, X., et al. showed that SIRT1 reduces the expression of A $\beta$  [42] and tau [43], which are associated with AD. Mitochondrial dysfunction is involved in aging and various degenerative diseases, and SIRT1 can regulate mitochondrial biosynthesis and metabolism, repair mitochondrial loss and maintain mitochondrial stability [44]. Furthermore, Shi, L. et al. revealed that SIRT1 directly controls the activity of proliferator-activated receptor  $\gamma$  coactivator 1 $\alpha$  (PGC-1 $\alpha$ ) through phosphorylation and deacetylation to regulate mitochondrial function [45]. These findings illustrate that SIRT1 is a potential therapeutic target for AD and remains to be further revealed.

Therefore, our study screened sporadic AD and MCI patients of community origin among the elderly aged 60 years and above in Hubei Province through a cross-sectional study, and then a 1:1:1 case-control study was conducted in 26 AD patients, 26 MCI patients, and 26 NC subjects, according to gender and age ( $\pm 2$  years). A total of 26 NC subjects were selected and their peripheral venous blood was collected to find a more stable biomarker for the early diagnosis of AD by detecting the levels of serum SIRT1, IL-6, T-tau, P-tau-181, and A $\beta$ 1-42 proteins in the three groups of subjects, to provide ponderable help for the early diagnosis of AD.

In the transition from MCI to AD, namely, the AD stage, the opposite changes in blood glucose and lipid levels may occur, which is consistent with Shang Ying's report [46], that is, the relationship between blood glucose level and hyperlipidemia and Alzheimer's disease may not be positively correlated. Compared with that in the NC group, the serum A $\beta$ 1-42 level in the MCI group was significantly up-regulated ( $P < 0.05$ ); that in the AD group was also up-regulated, but not statistically significantly ( $P > 0.05$ ), which indicated a trend of up-regulation first and then down-regulation among NC, MCI, and AD groups. Compared with those in the NC group, the serum P-tau-181 and T-tau levels showed a trend of up-regulation first and then down-regulation in

the MCI and AD groups, but not statistically significantly ( $P > 0.05$ ). Possible reasons are as follows: on the one hand, when normal people first manifest cognitive impairment in the process of transforming to MCI, the levels of A $\beta$ 1-42, T-tau, and P-tau-181 proteins in the brain increase sharply. The concentration of these proteins in the blood is greatly diluted owing to the existence of the blood-brain barrier [47]. Once there is progression to AD, the levels of the three proteins stabilize at a low level. On the other hand, the concentration of A $\beta$  in peripheral blood is affected by the small amount of A $\beta$  produced by platelets, so its concentration change in CSF is not synchronized [48]. It has been reported [49] that plasma A $\beta$ 1-42 protein concentration was down-regulated significantly in both AD and MCI patients. However, studies by some scholars have shown [50] that the changes in plasma A $\beta$ 1-42 protein concentration in AD and MCI patients show staged differences, that is, the concentration of A $\beta$ 1-42 down-regulates with progression from the MCI stage to the AD stage, but there is no significant difference with progression from the normal state to the MCI stage. It has also been reported [51] that the concentration of plasma A $\beta$ 1-42 protein in AD patients is significantly higher than that in the NC group. In short, the research results of A $\beta$ 1-42 in the peripheral blood of patients with AD and early MCI by different researchers are inconsistent, or even opposite, and A $\beta$ 40 in plasma is also inconsistent [52]. However, serum A $\beta$ 1-42, T-tau, and P-tau-181 protein levels were inversely correlated with MMSE scores, which was consistent with previous findings. The levels of these special proteins were up-regulated or down-regulated sharply in the MCI stage, but were down-regulated or up-regulated sharply in the AD stage. This disorder in the level of specific protein changes suggests the importance of studying biomarkers of MCI in the early stages of AD, the intermediate stage of the disease.

Our data demonstrated that the levels of SIRT1 decreased significantly in AD patients. According to the detection of serum SIRT1, IL-6, T-tau, P-tau-181, and A $\beta$ 1-42 proteins, the results showed that in the NC, MCI, and AD groups, the serum SIRT1 protein levels were down-regulated successively, and they were ( $2.90 \pm 2.01$ ), ( $1.29 \pm 0.21$ ), and ( $1.06 \pm 0.471$ ) ng/ $\mu$ L, respectively. Compared with that in the NC group, the serum SIRT1 levels in the MCI and AD groups were significantly down-regulated, and the difference was statistically significant ( $P < 0.05$ ). Interestingly, the serum SIRT1 protein levels in the case groups and the control group were positively correlated with the MMSE score ( $r_s = 0.47$ ,  $P = 0.000$ ), and the difference was statistically significant ( $P < 0.05$ ), which was consistent with a previous report [53]. The levels of IL-6 were up-regulated with the progression of disease

from NC to MCI and then to AD: they were (1.65±0.35), (2.02±0.56), and (3.58±0.98) ng/μL, respectively. Compared with that in the NC group, the serum IL-6 levels in the MCI and AD groups were significantly up-regulated ( $P < 0.05$ ). These results suggest that inflammation is an important process of MCI to AD transformation. It was also found that serum IL-6 level was inversely correlated with SIRT1 level ( $r_1 = -0.73$ ,  $P = 0.000$ ), and the difference was statistically significant ( $P < 0.05$ ). Studies have shown that [54] compared with cognitively healthy controls, AD patients may have inflammatory signs in the hypothalamus and hippocampus (as shown by T2 hyperintensity). T2 hyperintensity in the hypothalamus and hippocampus is positively correlated with plasma IL-6 concentration and inversely correlated with MMSE score, which is very important for the production of AD. Chen X. [54] et al. showed that the genetic variation and deacetylation function of SIRT1 are directly related to the occurrence of inflammation, and play a role in inhibiting inflammation through the NF-κB pathway, thereby inhibiting the expression of IL-6.

On analyzing the sensitivities, specificities, and AUCs of SIRT1, IL-6, Aβ1-42, P-tau-181, and T-tau in serum, the sensitivities and specificities of the serum proteins decreased successively: P-tau-181 (92.3%, 76.9%), SIRT1 (88.5%, 65.4%), Aβ1-42 (80.8%, 46.2%), T-tau (80.8%, 42.3%), IL-6 (76.9%, 100.0%). However, the AUC was IL-6 > P-tau-181 > SIRT1 > Aβ1-42 > T-tau. ROC analysis showed the AUC, sensitivity and specificity of screening AD using P-tau-181 were all higher than that using SIRT1. However, the serum P-tau-181 levels was no significant difference among the NC, MCI, and AD groups ( $P > 0.05$ ). The ROC curve is only an estimate, and serological results are more reliable, so we did not consider the diagnostic performance of P-tau-181. The levels of SIRT1, IL-6, and P-tau-181 and MMSE were considered statistically significant ( $P < 0.05$ ), but the levels of Aβ1-42 and T-tau were not considered statistically significant ( $P > 0.05$ ). The results showed that the sensitivity and specificity of screening AD were best when the critical value of the MMSE was above 18. However, there is a certain subjective bias in the scale, which is not as accurate as the blood index. The performances of SIRT1 combined with other markers of AD require further study in the future.

### Strength and limitations

Our study is the first cross-sectional and case-control study of sporadic AD and MCI in Hubei province. In addition, our results provide more meaningful biomarkers for the early diagnosis of AD, and also provide new ideas for the basis of early diagnosis. However, to some extent, our study also had some limitations, and there is a need to

conduct validation with a larger sample size of AD patients from different sources in the future to obtain more relevant and reliable evidence.

## CONCLUSIONS

In a word, the present study revealed that serum SIRT1 presumably was an early promising diagnostic biomarker for AD.

## MATERIALS AND METHODS

### Source of subjects

A cross-sectional and case-control study were performed. The case groups and the control group were all from Qichun County, Huanggang City, and Dongbao District, Jingmen City, Hubei Province. The case groups were AD and MCI patients aged  $\geq 60$  years, with 26 cases in each group. Their mean ages were (70.02 ± 4.68) and (69.83 ± 4.84) years, respectively, while the control group consisted of 26 healthy elderly people aged  $\geq 60$  years, with a mean age of (70.17 ± 5.99) years. As shown in Table 5A. General information of case group and control group, including education level, alcohol drinking, tea drinking, physical exercise, and body mass index (BMI), marital status, disease history, and smoking were collected and summarized in Table 5B. The research protocol of the experiment was approved by the Ethics Committee of the Medical College of Wuhan University of Science and Technology, and informed consent was obtained from all individual participants of the present study.

### Inclusion and exclusion criteria

#### *Inclusion and exclusion criteria for the case group*

The results are shown in Table 6A.

#### *Inclusion criteria and exclusion for the control group*

The results are shown in Table 6B.

### Collection, processing, storage and transportation of blood samples

With the informed consent of all the researchers, the serum samples of the case group and the control group were collected. The specific collection methods are as follows:

- (1) The blood collection code strip was affixed, and the blood collection code was filled in the circulation form of the respondents by special personnel at the registry office, and the blood collection code strip was affixed on the blood collection vessels as required.



**Table 5A. Age, gender and MMSE score of case group and control group.**

| Variables            | AD (n=26)  | MCI (n=26) | NC (n=26)  | P     |
|----------------------|------------|------------|------------|-------|
| Age (Years, mean±SD) | 70.17±5.99 | 69.83±4.84 | 70.02±4.68 | 0.823 |
| Gender (M/F)         | 11/15      | 11/15      | 11/15      | 1.00  |
| MMSE (mean±SD)       | 28.00±1.17 | 21.83±1.97 | 13.65±3.34 | 0.001 |

Note: Mini-mental State Examination (MMSE); Equilibrium analysis showed that there were no statistically significant differences in age and gender between the AD and MCI case groups and the respective control group ( $p > 0.05$ ), indicating that the groups were comparable. AD, Alzheimer's Disease; MCI, mild cognitive impairment, NC, normal control.

**Table 5B. General information of case group and control group.**

| Variables               | NC (n=26)  | MCI (n=26) | AD (n=26)  | P     |
|-------------------------|------------|------------|------------|-------|
| Education n (%)         |            |            |            | 0.001 |
| University              | 0(0)       | 4(15.38)   | 0(0)       |       |
| High school             | 5 (19.23)  | 2(7.69)    | 0(0)       |       |
| Junior middle school    | 10(38.46)  | 5(19.23)   | 0(0)       |       |
| Primary school          | 7(26.92)   | 10(38.46)  | 1(3.85)    |       |
| Illiterate              | 4(15.38)   | 5(19.23)   | 25(96.15)  |       |
| Marital status n (%)    |            |            |            | 0.211 |
| Married                 | 21(80.77)  | 21(80.77)  | 16(61.54)  |       |
| Divorce                 | 0(0)       | 1(3.85)    | 0(0)       |       |
| Widowed                 | 5(19.23)   | 4(15.38)   | 8(30.77)   |       |
| Unmarried               | 0(0)       | 0(0)       | 2(7.69)    |       |
| Disease history n (%)   |            |            |            | 0.768 |
| Diabetes                | 2(7.69)    | 1(3.85)    | 1(3.85)    | 0.582 |
| Hypertension            | 7(26.92)   | 10(38.46)  | 14(53.85)  | 0.062 |
| Stroke                  | 1(3.85)    | 4(15.38)   | 0(0)       | 0.652 |
| Smoking n (%)           |            |            |            |       |
| Never smoked            | 20(76.92)  | 20(76.92)  | 19(73.08)  |       |
| Used to smoke           | 1(3.85)    | 3 (11.54)  | 3 (11.54)  |       |
| Smoking now             | 5(19.23)   | 3 (11.54)  | 4(15.38)   |       |
| Drinking n (%)          |            |            |            | 0.031 |
| Never drink             | 20(76.92)  | 19 (73.08) | 24(92.31)  |       |
| Go to drink             | 0(0)       | 4 (15.38)  | 0(0)       |       |
| Drink now               | 6(23.08)   | 3 (11.54)  | 2(7.69)    |       |
| Drinking tea n (%)      |            |            |            | 0.001 |
| Never drink tea         | 11(42.30)  | 10(38.46)  | 24(92.31)  |       |
| Drink tea in the past   | 5(19.23)   | 4(15.38)   | 0(0)       |       |
| Now drink tea           | 10(38.46)  | 12(46.15)  | 2(7.69)    |       |
| Physical exercise n (%) |            |            |            | 0.001 |
| Low intensity           | 14(53.85)  | 4(15.38)   | 1(3.85)    |       |
| Medium intensity        | 10(38.46)  | 2(7.69)    | 0(0)       |       |
| High intensity          | 2(7.69)    | 20(76.92)  | 25(96.15)  |       |
| BMI (mean±SD)           | 24.15±3.15 | 23.35±2.52 | 20.96±2.92 | 0.001 |

Note: (1) \*  $P \leq 0.05$  indicates statistical significance.

- (2) Low-intensity exercise: regular exercise for less than 1 hour, such as office workers; medium-intensity exercise: exercise for more than 1 hour and less than 2 hours, such as drivers; high-intensity exercise: exercise for more than 2 hours per week, such as farmers and steelmakers workers, etc.
- (3) BMI = weight (kg)/height (m)<sup>2</sup>.

**Table 6A. Inclusion and exclusion criteria for the case group.**

| Inclusion criteria for the AD group                                                                                                                                                                                                                                                                                                                                                                                                                                                                                                                                                                                                                                                                                                          | Inclusion criteria for the MCI group                                                                                                                                                                                                                                                                                                                                                                                                                                                                                                                       | Exclusion criteria for the case group                                                                                                                                                                                                                                                                                                                                                                                                                                                                                                                                                                                                                                                                                                  |
|----------------------------------------------------------------------------------------------------------------------------------------------------------------------------------------------------------------------------------------------------------------------------------------------------------------------------------------------------------------------------------------------------------------------------------------------------------------------------------------------------------------------------------------------------------------------------------------------------------------------------------------------------------------------------------------------------------------------------------------------|------------------------------------------------------------------------------------------------------------------------------------------------------------------------------------------------------------------------------------------------------------------------------------------------------------------------------------------------------------------------------------------------------------------------------------------------------------------------------------------------------------------------------------------------------------|----------------------------------------------------------------------------------------------------------------------------------------------------------------------------------------------------------------------------------------------------------------------------------------------------------------------------------------------------------------------------------------------------------------------------------------------------------------------------------------------------------------------------------------------------------------------------------------------------------------------------------------------------------------------------------------------------------------------------------------|
| (1) Aged 60 years and above;<br>(2) MMSE assessment: illiteracy $\leq 17$ points, primary school $\leq 20$ points, middle school or above education $\leq 24$ points;<br>(3) Meet the criteria for diagnosis of AD in NIA-AA (2011) [55], including memory impairment; at least one abnormality in aphasia, apraxia (normal motor function), agnosia (normal vision), and executive dysfunction; cognitive dysfunction seriously affecting occupational and social functions;<br>(4) CDR $\geq 1$ point;<br>(5) HIS $\leq 4$ points;<br>(6) GDS in 21 ~ 30 points;<br>(7) Patients and their family members gave informed consent and voluntarily signed consent forms.<br>(8) Combining imaging manifestations and diagnosis were positive. | (1) Aged 60 years and above;<br>(2) MMSE: illiteracy $> 17$ , primary school $> 20$ , middle school or above education $> 24$ ;<br>(3) Meeting the Peterson diagnostic criteria: informant report or patient's complaint of memory impairment; Normal general cognitive function; Normal daily living ability; Does not meet the diagnostic criteria for dementia;<br>(4) CDR $\leq 0.5$ point;<br>(5) HIS $\leq 4$ points;<br>(6) GDS $< 21$ points;<br>(7) Patients and their family members gave informed consent and signed consent forms voluntarily. | (1) Presence of other types of dementia (such as Vascular dementia (VD) and Parkinson disease (PD)) or systemic diseases that can cause dementia;<br>(2) Dementia caused by intracranial space-occupying lesions or other physical and chemical factors, such as brain tumours, brain trauma, inflammatory or demyelinating diseases of the central nervous system, and normal intracranial pressure hydrocephalus;<br>(3) Presence of significant mental illnesses such as depression, schizophrenia, and alcohol abuse or drug use disorders;<br>(4) Patients with severe visual and hearing impairment or other physical diseases and who are unable to cooperate with the completion of the questionnaires and other examinations. |

Note: CDR, Clinical Dementia Rating; HIS, Hachinski Ischemic Score; GDS, Geriatric Depression Scale.

**Table 6B. Inclusion criteria and exclusion for the control group.**

| Inclusion criteria for the control group                                                                                                                 | Exclusion criteria for the control group                                                                                                                           |
|----------------------------------------------------------------------------------------------------------------------------------------------------------|--------------------------------------------------------------------------------------------------------------------------------------------------------------------|
| (1) Age $\geq 60$ years;<br>(2) Normal ability of daily living;<br>(3) MMSE $\geq 28$ , cognitive function normal;<br>(4) No family history of dementia. | (1) MMSE $\leq 28$ points;<br>(2) Having other types of dementia, cerebrovascular diseases, such as stroke, meningitis, and other central nervous system diseases. |

- (2) Collecting 3-4ml venous blood in 5ml disposable vacuum negative pressure collection vessel (red cap tube, with milkWhite glue block), we placed it at room temperature for 30 minutes, centrifuged at 3000r/min for about 15 minutes, and separated the serum in the clean workbench (note: the lid must be tightly covered, affixed with the corresponding label, immediately transferred to -20° C for storage).
- (3) We collected 3-4ml venous blood in a disposable vacuum negative pressure EDTA-2K anticoagulant collection vessel (purple cap tube). The venous blood was then gently upside down 6 times,

transferred to -20° C within 1 hour for storage, used for plasma isolation.

- (4) After all blood samples are processed, the numbers must be checked, and a record paper must be attached to each freezing box, indicating the starting number, ending number, lack number, hemolysis number and date of the district (county), township (street) and village (neighborhood committee) where the blood is collected; and attach the signature of the person in charge. In addition, the freezing box number and blood sample type (serum, plasma, whole blood) should be marked on

the surface and side of the freezing box. The blood samples were stored at low temperature in the laboratories of each project site and transported to the testing center of Wuhan University of Science and Technology School of Medicine on dry ice within one week.

### **Blood biochemical indexes were detected by a microplate reader**

Fasting blood glucose (FBG), triglyceride (TG), total cholesterol (TC), high density lipoprotein cholesterol (HDL-C) and low density lipoprotein cholesterol (LDL-C) were measured by a microplate reader in 26 patients with AD, 26 patients with MCI and 26 patients with NCs. The kits were from Zhongsheng Beikong Biotechnology Co., Ltd. (China), and the specific operation methods were strictly in accordance with the kit instructions.

### **Serum SIRT1, IL-6, A $\beta$ 1-42, T-Tau, and P-tau-181 detection by ELISA**

SIRT1, IL-6, A $\beta$ 1-42, T-Tau, and P-tau-181 levels in serum samples were measured by ELISA (Elabscience Inc., WH, China), as stated or reported by the manufacturer's instructions. In simple terms, a microtiter plate coated with capture antibody was incubated with 100- $\mu$ l serum samples from the case group and NC group for 1 h at 37° C. The detection antibody was added after washing and incubated for 30 min at room temperature. Adequate washing was carried out after each step. Following avidin-horseradish peroxidase-conjugated secondary antibody and TMB substrate solution, stop solution was added to terminate the reaction. Eventually, every protein was determined at a special wavelength using a Model 96 microplate reader. Each sample was analyzed in duplicate.

### **Statistical analysis**

SPSS 22.0 software (SPSS Inc., Chicago, IL, U.S.A.) was used to analyze all data for statistical significance. All data are presented as mean  $\pm$ SD. For general demographic data, the  $\chi^2$  test was used for categorical variables and the Mann Whitney–Wilcoxon test was used for continuous variables. ANOVA was performed to ascertain any statistically significant differences between the preoperative and postoperative levels of proteins. Pearson correlation coefficient was used to evaluate the correlation between the two biomarkers. ROC curves drawn assess diagnostic capability. AUC and 95% confidence intervals were used to assess discrimination ability. Values of  $P < 0.05$  were considered statistically significant.

### **Consent for publication**

Informed consent for publication of this report and any accompanying images was obtained from the participants.

### **Availability of data and materials**

The datasets used and/or analysed during the current study available from the corresponding author on reasonable request.

### **Abbreviations**

AD: Alzheimer's Disease; MCI: Mild Cognitive Impairment; NC: Normal Control; MMSE: Mini-Mental State Examination; ADL: Activities of Daily Living; NIA-AA: National Institute on Aging-Alzheimer's Association; GDS: Geriatric Depression Scale; HIS: Hachinski Ischemic Score; CDR: Clinical Dementia Rating; CT: computed tomography; Mean $\pm$ SD: mean $\pm$  standard deviation; OR: odds ratio; CI: confidence interval; ROC: receiver operator characteristic curve; AUC: Area under the ROC curve; Se: sensitivity; Sp: specificity; ELISA: Enzyme Linked Immunosorbent Assay; CSF: Cerebrospinal Fluid; MoCA: Montreal Cognitive Assessment; VD: Vascular dementia; PD: Parkinson's disease; BMI: body mass index; FBG: fasting blood glucose; L-LDL: Low-density lipoprotein cholesterol; H-LDL: High-density lipoprotein cholesterol; TC: total cholesterol; TG: triglyceride.

### **AUTHOR CONTRIBUTIONS**

JC conceived and designed the study. FZ, JZ, YZ, SQ, ZW offered us epidemiological investigation strong support, JW, CX, GW, LC, CM, YX performed the study and wrote the paper. JW, FZ and CX were as co-author. These authors contributed equally to this work. All authors contributed to discussions and the writing of the manuscript. All authors read and approved the final manuscript.

### **ACKNOWLEDGMENTS**

We wish to thank the participants for taking part in the study. We also thank the Wuhan University of Science and Technology Medical College, Chinese Center for Disease Control and Prevention, Hubei Province Center for Disease Control and Prevention, Jingmen City Center for Disease Control and Prevention, and Qichun County Center for Disease Control and Prevention, who assisted in the conduct of the project, in particular Ms Fang Zhou, Mr Zhi-hui Wang, Ms Shi-ge Qi, Mr Jian-bo Zhan, Mr Chun-lin Guan, Ms Li-kai Qu, Ms Mei-hua Li,

Mr Zhi-yun Gao, Mr Jing Li, Ms shuang Rong, Mr Hai-lin Zhu, Mr Ben-chao Li, Mr Hao-yue Li and some counsellors. We also thank the NativeEE (<https://www.nativeee.com>), which offered polishing service.

## CONFLICTS OF INTEREST

The authors declare that they have no conflicts of interest.

## ETHICAL STATEMENT AND CONSENT

The study was conducted in accordance with the Declaration of Helsinki and the study was approved by the Ethics Committees of the Wuhan University of Science and Technology Medical College. The ethical approval number is 2022131. Informed consent was obtained from all subjects and/or their legal guardian(s). All methods were performed in accordance with the relevant guidelines and regulations.

## FUNDING

This study was supported by grants from the Wuhan University of Science and Technology (22Z102), Hubei Province Key Laboratory of Occupational Hazard Identification and Control (OHIC2019G04), Education Department of Hubei Province (19Q016). The China Mega-Project for Infectious Diseases of the Ministry of Science and Technology and Ministry of Health of the People's Republic of China (2018ZX10201002), National Innovation and Entrepreneurship Training Program for College Students (201810488038), Science and Technology Department of Hubei Province (2018CFB630).

## REFERENCES

1. Global Dementia Observatory (GDO). p. The Global Dementia Observatory (GDO). <https://www.who.int/data/gho/data/themes/global-dementia-observatory-gdo>, August 2021.
2. Breijyeh Z, Karaman R. Comprehensive Review on Alzheimer's Disease: Causes and Treatment. *Molecules*. 2020; 25:5789. <https://doi.org/10.3390/molecules25245789> PMID:33302541
3. Togo T. Posters, International Psychogeriatrics. *International Psychogeriatrics*. 2005.
4. The global health observatory [EB/OL], <https://www.who.int/data/gho/data/themes/global-dementia-observatory-gdo>, 2022-01-24.
5. Levy BI, Merkulova-Rainon T, Kubis N. Arterial System. *Hypertension*. 2018; 72:1076–7. <https://doi.org/10.1161/HYPERTENSIONAHA.118.11829> PMID:30354829
6. Yao Z, Zhang Y, Lin L, Zhou Y, Xu C, Jiang T, and Alzheimer's Disease Neuroimaging Initiative. Abnormal cortical networks in mild cognitive impairment and Alzheimer's disease. *PLoS Comput Biol*. 2010; 6:e1001006. <https://doi.org/10.1371/journal.pcbi.1001006> PMID:21124954
7. Sanford AM. Mild Cognitive Impairment. *Clin Geriatr Med*. 2017; 33:325–37. <https://doi.org/10.1016/j.cger.2017.02.005> PMID:28689566
8. Rabbito A, Dulewicz M, Kulczyńska-Przybik A, Mroczko B. Biochemical Markers in Alzheimer's Disease. *Int J Mol Sci*. 2020; 21:1989. <https://doi.org/10.3390/ijms21061989> PMID:32183332
9. Khan S, Barve KH, Kumar MS. Recent Advancements in Pathogenesis, Diagnostics and Treatment of Alzheimer's Disease. *Curr Neuropharmacol*. 2020; 18:1106–25. <https://doi.org/10.2174/1570159X18666200528142429> PMID:32484110
10. Mecca AP, van Dyck CH. Alzheimer's and Dementia: The Journal of the Alzheimer's Association. *Alzheimers Dement*. 2021; 17:316–7. <https://doi.org/10.1002/alz.12190> PMID:33047474
11. Lu Y. Early increase of cerebrospinal fluid 14-3-3 $\zeta$  protein in the alzheimer's disease continuum. *Front Aging Neurosci*. 2022; 14:941927. <https://doi.org/10.3389/fnagi.2022.941927> PMID:35966774
12. Abstracts of the Eighteenth Meeting of the European Neurological Society. June 7-11, 2008. Nice, France. *J Neurol*. 2008 (Suppl 2); 255:3–220. <https://doi.org/10.1007/s00415-008-2001-5> PMID:18465113
13. Su Z, Zhang Y, Zhang X, Zhang H, Jin S, Bao Y, Wang Z, Yan R, Wu X, Jin Y. Hyaluronic Acid Nanomicelles for Photo-chemodynamic Antitumor Therapy. *ACS Appl Nano Mater*. 2023; 6:13076–94. <https://doi.org/10.1021/acsnm.3c01790>
14. Zalocusky KA, Najm R, Taubes AL, Hao Y, Yoon SY, Koutsodendrakis N, Nelson MR, Rao A, Bennett DA, Bant J, Amornkul DJ, Xu Q, An A, et al. Neuronal ApoE upregulates MHC-I expression to drive selective neurodegeneration in Alzheimer's disease. *Nat Neurosci*. 2021; 24:786–98. <https://doi.org/10.1038/s41593-021-00851-3> PMID:33958804

15. Lithgow BJ, Dastgheib Z, Moussavi Z. Baseline Prediction of rTMS efficacy in Alzheimer patients. *Psychiatry Res.* 2022; 308:114348. <https://doi.org/10.1016/j.psychres.2021.114348> PMID:34952254
16. Leuzy A, Mattsson-Carlgrén N, Palmqvist S, Janelidze S, Dage JL, Hansson O. Blood-based biomarkers for Alzheimer's disease. *EMBO Mol Med.* 2022; 14:e14408. <https://doi.org/10.15252/emmm.202114408> PMID:34859598
17. Mandal PK, Dwivedi D, Joon S, Goel A, Ahasan Z, Maroon JC, Singh P, Saxena R, Roy RG. Quantitation of Brain and Blood Glutathione and Iron in Healthy Age Groups Using Biophysical and *In Vivo* MR Spectroscopy: Potential Clinical Application. *ACS Chem Neurosci.* 2023; 14:2375–84. <https://doi.org/10.1021/acchemneuro.3c00168> PMID:37257017
18. Cao X, Zhao S. Molecular mechanism of non-coding RNA targeting zinc finger binding protein 1 and cervical cancer cells suppression. *Journal of King Saud University - Science.* 2022; 34:101870. <https://doi.org/10.1016/j.jksus.2022.101870>
19. Galka M. Poster Session 2, European Journal of Neurology, 92006. *European Journal of Ageing.* 2006.
20. Li Q, Li F, Chen Z, Deng S, Cao X, Tang N. Hydroxysafflor yellow A improves diabetes-induced renal fibrosis. *Archives of Acoustics.* 2020. <https://doi.org/10.5114/aoms.2020.97813>
21. Frank B, Ally M, Brekke B, Zetterberg H, Blennow K, Sugarman MA, Ashton NJ, Karikari TK, Tripodis Y, Martin B, Palmisano JN, Steinberg EG, Simkina I, et al. Plasma p-tau<sub>181</sub> shows stronger network association to Alzheimer's disease dementia than neurofilament light and total tau. *Alzheimers Dement.* 2022; 18:1523–36. <https://doi.org/10.1002/alz.12508> PMID:34854549
22. Shui B, Tao D, Florea A, Cheng J, Zhao Q, Gu Y, Li W, Jaffrezic-Renault N, Mei Y, Guo Z. Biosensors for Alzheimer's disease biomarker detection: A review. *Biochimie.* 2018; 147:13–24. <https://doi.org/10.1016/j.biochi.2017.12.015> PMID:29307704
23. Chang CH, Lin CH, Lane HY. Machine Learning and Novel Biomarkers for the Diagnosis of Alzheimer's Disease. *Int J Mol Sci.* 2021; 22:2761. <https://doi.org/10.3390/ijms22052761> PMID:33803217
24. Park JC, Han SH, Mook-Jung I. Peripheral inflammatory biomarkers in Alzheimer's disease: a brief review. *BMB Rep.* 2020; 53:10–9. <https://doi.org/10.5483/BMBRep.2020.53.1.309> PMID:31865964
25. Wang H, Dey KK, Chen PC, Li Y, Niu M, Cho JH, Wang X, Bai B, Jiao Y, Chepyala SR, Haroutunian V, Zhang B, Beach TG, Peng J. Integrated analysis of ultra-deep proteomes in cortex, cerebrospinal fluid and serum reveals a mitochondrial signature in Alzheimer's disease. *Mol Neurodegener.* 2020; 15:43. <https://doi.org/10.1186/s13024-020-00384-6> PMID:32711556
26. Wang R, Wu Y, Liu R, Liu M, Li Q, Ba Y, Huang H. Deciphering therapeutic options for neurodegenerative diseases: insights from SIRT1. *J Mol Med (Berl).* 2022; 100:537–53. <https://doi.org/10.1007/s00109-022-02187-2> PMID:35275221
27. Lu Y, Tan L, Wang X. Circular HDAC9/microRNA-138/Sirtuin-1 Pathway Mediates Synaptic and Amyloid Precursor Protein Processing Deficits in Alzheimer's Disease. *Neurosci Bull.* 2019; 35:877–88. <https://doi.org/10.1007/s12264-019-00361-0> PMID:30887246
28. Chen C, Zhou M, Ge Y, Wang X. SIRT1 and aging related signaling pathways. *Mech Ageing Dev.* 2020; 187:111215. <https://doi.org/10.1016/j.mad.2020.111215> PMID:32084459
29. Qi XT, Li YL, Zhang YQ, Xu T, Lu B, Fang L, Gao JQ, Yu LS, Zhu DF, Yang B, He QJ, Ying MD. KLF4 functions as an oncogene in promoting cancer stem cell-like characteristics in osteosarcoma cells. *Acta Pharmacol Sin.* 2019; 40:546–55. <https://doi.org/10.1038/s41401-018-0050-6> PMID:29930276
30. Liu L, Xia G, Li P, Wang Y, Zhao Q. Sirt-1 Regulates Physiological Process and Exerts Protective Effects against Oxidative Stress. *Biomed Res Int.* 2021; 2021:5542545. <https://doi.org/10.1155/2021/5542545> PMID:33834065
31. Cheng J, Ji X, He L, Zhang Y, Xiao T, Geng Q, Wang Z, Qi S, Zhou F, Zhan J. Epidemiological Characteristics and Factors Associated with Alzheimer's Disease and Mild Cognitive Impairment among the Elderly in Urban and Rural Areas of Hubei Province. *J Clin Med.* 2022; 12:28. <https://doi.org/10.3390/jcm12010028> PMID:36614829
32. Yang Y, Liu Y, Wang Y, Chao Y, Zhang J, Jia Y, Tie J, Hu D. Regulation of SIRT1 and Its Roles in Inflammation. *Front Immunol.* 2022; 13:831168. <https://doi.org/10.3389/fimmu.2022.831168> PMID:35359990

33. Wang L, Xu C, Johansen T, Berger SL, Dou Z. SIRT1 - a new mammalian substrate of nuclear autophagy. *Autophagy*. 2021; 17:593–5. <https://doi.org/10.1080/15548627.2020.1860541> PMID:[33292048](https://pubmed.ncbi.nlm.nih.gov/33292048/)
34. Rao YL, Ganaraja B, Murlimanju BV, Joy T, Krishnamurthy A, Agrawal A. Hippocampus and its involvement in Alzheimer's disease: a review. *3 Biotech*. 2022; 12:55. <https://doi.org/10.1007/s13205-022-03123-4> PMID:[35116217](https://pubmed.ncbi.nlm.nih.gov/35116217/)
35. Xu Y, Hu R, He D, Zhou G, Wu H, Xu C, He B, Wu L, Wang Y, Chang Y, Ma R, Xie M, Xiao Z. Bisdemethoxycurcumin inhibits oxidative stress and antagonizes Alzheimer's disease by up-regulating SIRT1. *Brain Behav*. 2020; 10:e01655. <https://doi.org/10.1002/brb3.1655> PMID:[32441492](https://pubmed.ncbi.nlm.nih.gov/32441492/)
36. Chuang Y, Van I, Zhao Y, Xu Y. Icarin ameliorate Alzheimer's disease by influencing SIRT1 and inhibiting A $\beta$  cascade pathogenesis. *J Chem Neuroanat*. 2021; 117:102014. <https://doi.org/10.1016/j.jchemneu.2021.102014> PMID:[34407393](https://pubmed.ncbi.nlm.nih.gov/34407393/)
37. Pradhan R, Singh AK, Kumar P, Bajpai S, Pathak M, Chatterjee P, Dwivedi S, Dey AB, Dey S. Blood Circulatory Level of Seven Sirtuins in Alzheimer's Disease: Potent Biomarker Based on Translational Research. *Mol Neurobiol*. 2022; 59:1440–51. <https://doi.org/10.1007/s12035-021-02671-9> PMID:[34993847](https://pubmed.ncbi.nlm.nih.gov/34993847/)
38. Jiao F, Gong Z. The Beneficial Roles of SIRT1 in Neuroinflammation-Related Diseases. *Oxid Med Cell Longev*. 2020; 2020:6782872. <https://doi.org/10.1155/2020/6782872> PMID:[33014276](https://pubmed.ncbi.nlm.nih.gov/33014276/)
39. Cui Z, Zhao X, Ameer FK, Du X, Wang Y, Li D, Shu G, Tian Y, Zhao X. Therapeutic application of quercetin in aging-related diseases: SIRT1 as a potential mechanism. *Front Immunol*. 2022; 13:943321. <https://doi.org/10.3389/fimmu.2022.943321> PMID:[35935939](https://pubmed.ncbi.nlm.nih.gov/35935939/)
40. Mulica P, Grünewald A, Pereira SL. Astrocyte-Neuron Metabolic Crosstalk in Neurodegeneration: A Mitochondrial Perspective. *Front Endocrinol (Lausanne)*. 2021; 12:668517. <https://doi.org/10.3389/fendo.2021.668517> PMID:[34025580](https://pubmed.ncbi.nlm.nih.gov/34025580/)
41. Singh V, Ubaid S. Role of Silent Information Regulator 1 (SIRT1) in Regulating Oxidative Stress and Inflammation. *Inflammation*. 2020; 43:1589–98. <https://doi.org/10.1007/s10753-020-01242-9> PMID:[32410071](https://pubmed.ncbi.nlm.nih.gov/32410071/)
42. Yin Z, Geng X, Zhang Z, Wang Y, Gao X. Rhein Relieves Oxidative Stress in an A $\beta$ <sub>1-42</sub> Oligomer-Burdened Neuron Model by Activating the SIRT1/PGC-1 $\alpha$ -Regulated Mitochondrial Biogenesis. *Front Pharmacol*. 2021; 12:746711. <https://doi.org/10.3389/fphar.2021.746711> PMID:[34566664](https://pubmed.ncbi.nlm.nih.gov/34566664/)
43. Yin X, Zhou Z, Qiu Y, Fan X, Zhao C, Bao J, Liu C, Liu F, Qian W. SIRT1 Regulates Tau Expression and Tau Synaptic Pathology. *J Alzheimers Dis*. 2021; 84:895–904. <https://doi.org/10.3233/JAD-215118> PMID:[34602486](https://pubmed.ncbi.nlm.nih.gov/34602486/)
44. Sun K, Jing X, Guo J, Yao X, Guo F. Mitophagy in degenerative joint diseases. *Autophagy*. 2021; 17:2082–92. <https://doi.org/10.1080/15548627.2020.1822097> PMID:[32967533](https://pubmed.ncbi.nlm.nih.gov/32967533/)
45. Shi L, Zhang J, Wang Y, Hao Q, Chen H, Cheng X. Sirt1 Regulates Oxidative Stress in Oxygen-Glucose Deprived Hippocampal Neurons. *Front Pediatr*. 2020; 8:455. <https://doi.org/10.3389/fped.2020.00455> PMID:[32923413](https://pubmed.ncbi.nlm.nih.gov/32923413/)
46. de Leeuw FA, Karamujić-Čomić H, Tijms BM, Peeters CF, Kester MI, Scheltens P, Ahmad S, Vojinovic D, Adams HH, Hankemeier T, Bos D, van der Lugt A, Vernooij MW, et al. Circulating metabolites are associated with brain atrophy and white matter hyperintensities. *Alzheimers Dement*. 2021; 17:205–14. <https://doi.org/10.1002/alz.12180> PMID:[32886448](https://pubmed.ncbi.nlm.nih.gov/32886448/)
47. Yu H, Liu Y, He T, Zhang Y, He J, Li M, Jiang B, Gao Y, Chen C, Ke D, Liu J, He B, Yang X, Wang JZ. Platelet biomarkers identifying mild cognitive impairment in type 2 diabetes patients. *Aging Cell*. 2021; 20:e13469. <https://doi.org/10.1111/acer.13469> PMID:[34528736](https://pubmed.ncbi.nlm.nih.gov/34528736/)
48. Eckerström C, Eckerström M, Göthlin M, Molinder A, Jonsson M, Kettunen P, Svensson J, Rolstad S, Wallin A. Characteristic Biomarker and Cognitive Profile in Incipient Mixed Dementia. *J Alzheimers Dis*. 2020; 73:597–607. <https://doi.org/10.3233/JAD-190651> PMID:[31815692](https://pubmed.ncbi.nlm.nih.gov/31815692/)
49. Sturchio A, Dwivedi AK, Young CB, Malm T, Marsili L, Sharma JS, Mahajan A, Hill EJ, Andaloussi SE, Poston KL, Manfredsson FP, Schneider LS, Ezzat K, Espay AJ. High cerebrospinal amyloid- $\beta$  42 is associated with normal cognition in individuals with brain amyloidosis. *EClinicalMedicine*. 2021; 38:100988. <https://doi.org/10.1016/j.eclinm.2021.100988> PMID:[34505023](https://pubmed.ncbi.nlm.nih.gov/34505023/)
50. Pan FF, Huang Q, Wang Y, Wang YF, Guan YH, Xie F, Guo QH. Non-linear Character of Plasma Amyloid Beta Over the Course of Cognitive Decline in Alzheimer's Continuum. *Front Aging Neurosci*. 2022; 14:832700.

<https://doi.org/10.3389/fnagi.2022.832700>

PMID:[35401142](https://pubmed.ncbi.nlm.nih.gov/35401142/)

51. Yun G, Kim HJ, Kim HG, Lee KM, Hong IK, Kim SH, Rhee HY, Jahng GH, Yoon SS, Park KC, Hwang KS, Lee JS. Association Between Plasma Amyloid- $\beta$  and Neuropsychological Performance in Patients With Cognitive Decline. *Front Aging Neurosci.* 2021; 13:736937.

<https://doi.org/10.3389/fnagi.2021.736937>

PMID:[34759814](https://pubmed.ncbi.nlm.nih.gov/34759814/)

52. Giau VV, Bagyinszky E, An SS. Potential Fluid Biomarkers for the Diagnosis of Mild Cognitive Impairment. *Int J Mol Sci.* 2019; 20:4149.

<https://doi.org/10.3390/ijms20174149>

PMID:[31450692](https://pubmed.ncbi.nlm.nih.gov/31450692/)

53. Kumar R, Chaterjee P, Sharma PK, Singh AK, Gupta A, Gill K, Tripathi M, Dey AB, Dey S. Sirtuin1: a promising serum protein marker for early detection of Alzheimer's disease. *PLoS One.* 2013; 8:e61560.

<https://doi.org/10.1371/journal.pone.0061560>

PMID:[23613875](https://pubmed.ncbi.nlm.nih.gov/23613875/)

54. Chen X, Chen C, Fan S, Wu S, Yang F, Fang Z, Fu H, Li Y. Omega-3 polyunsaturated fatty acid attenuates the inflammatory response by modulating microglia polarization through SIRT1-mediated deacetylation of the HMGB1/NF- $\kappa$ B pathway following experimental traumatic brain injury. *J Neuroinflammation.* 2018; 15:116.

<https://doi.org/10.1186/s12974-018-1151-3>

PMID:[29678169](https://pubmed.ncbi.nlm.nih.gov/29678169/)

55. Petersen RC, Wiste HJ, Weigand SD, Fields JA, Geda YE, Graff-Radford J, Knopman DS, Kremers WK, Lowe V, Machulda MM, Mielke MM, Stricker NH, Thorneau TM, et al. NIA-AA Alzheimer's Disease Framework: Clinical Characterization of Stages. *Ann Neurol.* 2021; 89:1145–56.

<https://doi.org/10.1002/ana.26071>

PMID:[33772866](https://pubmed.ncbi.nlm.nih.gov/33772866/)
